# Supplementary material for: Distributions of total and size-fractionated particulate 210 Po and 210 Pb activities along the North Atlantic GEOTRACES GA01 transect: GEOVIDE cruise
Source: Copernicus journal article supplement (doi:10.5194/bg-15-5437-2018), 2018-09-14
Supplement: Supplementary file 1 [file bg-15-5437-2018-supplement.zip]

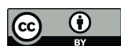

## *Supplement of*

# **Distributions of total and size-fractionated particulate $^{210}\text{Po}$ and $^{210}\text{Pb}$ activities along the North Atlantic GEOTRACES GA01 transect: GEOVIDE cruise**

**Yi Tang et al.**

*Correspondence to:* Gillian Stewart (gillian.stewart@qc.cuny.edu)

- bg-15-5437-2018-supplement-title-page.pdf
- Supplementary\_Revised
  - Tang et al\_GEOVIDE\_Supplementary1\_Aug122018.docx
  - Tang et al\_GEOVIDE\_Supplementary2\_Aug122018.xlsx

The copyright of individual parts of the supplement might differ from the CC BY 4.0 License.
